# Supplementary material
Source: PubMed Central journal article supplement (PMC4936547)
Supplement: supp_pp.16.00049_PP2016-00049DR1_Supplemental_Materialfig1.pdf [file supp_pp.16.00049_PP2016-00049DR1_Supplemental_Materialfig1.pdf]

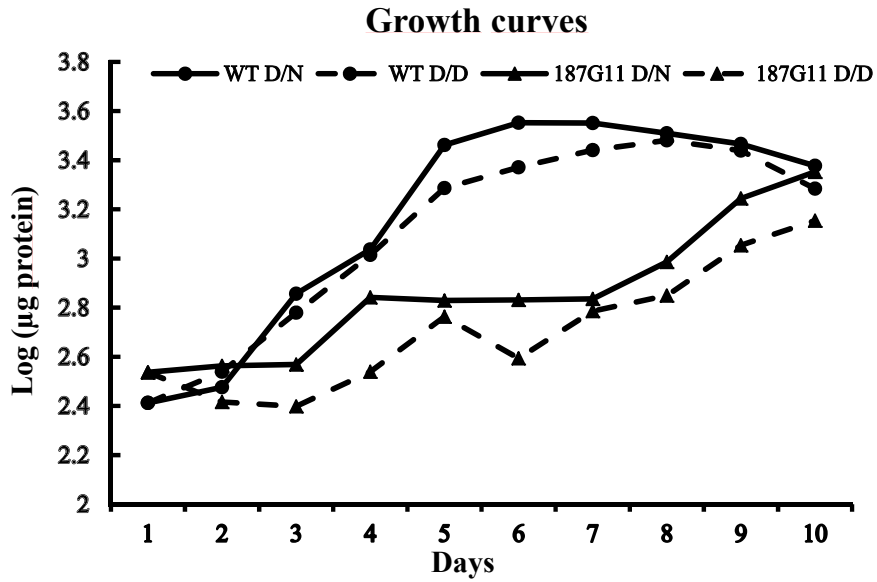

1  
 2 **Supplemental Figure 1. Growth curves of wild type (WT) and mutant (187G11) strains.**  
 3 Both strains were grown for 10 days in Artificial Sea Water ASNIII at 22°C and subjected to  
 4 light/dark cycles (12h/12h) (WT D/N, 187G11 D/N) or continuous light (24h) (WT D/D,  
 5 187G11 D/D). The cells were harvested every day for 10 days. The protein concentration was  
 6 determined in the supernatant using the Bradford method (Bio-Rad). The results are expressed  
 7 as Log (µg protein).  
 8
