# Supplementary material
Source: PubMed Central journal article supplement (PMC4936547)
Supplement: supp_pp.16.00049_PP2016-00049DR1_Supplemental_Materialfig2.pdf [file supp_pp.16.00049_PP2016-00049DR1_Supplemental_Materialfig2.pdf]

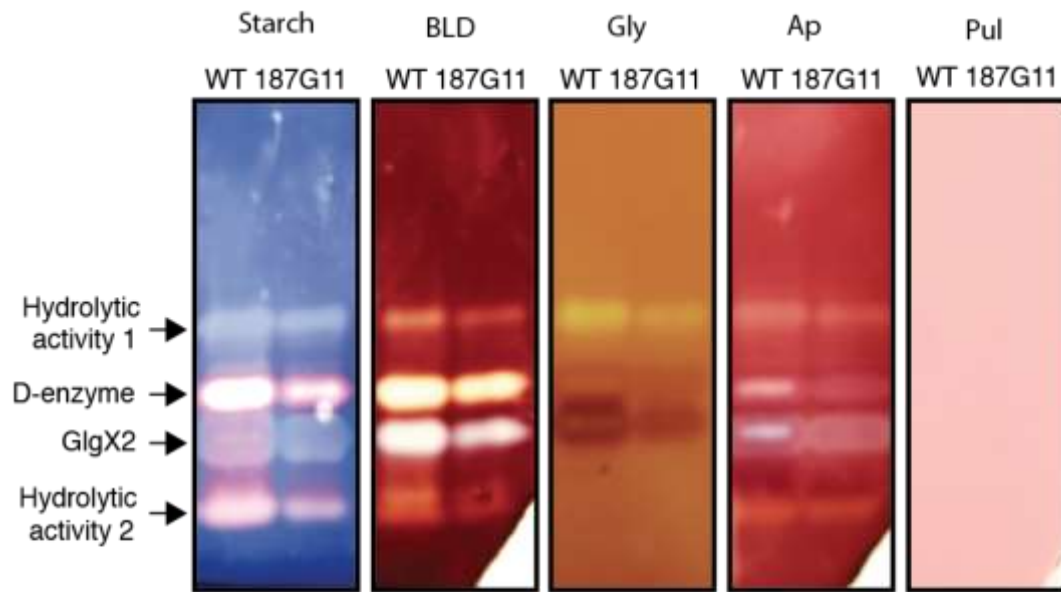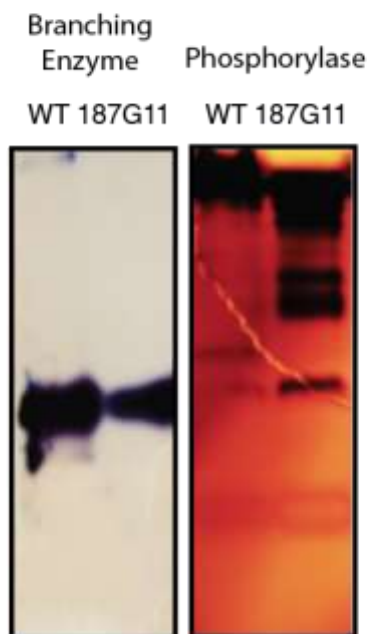

**Supplemental Figure 2. Zymogram analysis of the different enzymatic activities of glycogen/starch metabolism (synthesis and degradation) of the WT and mutant 187G11 strains.** Protein extracts are partially purified from both strains (see methods section). Partially purified proteins are separated on a native polyacrylamide gel, then transferred on a gel containing either 0.3% (weight/vol) of starch, beta limit dextrin (BLD), glycogen (Gly), amylopectin (Ap) or red pullulan (Pul). The gels are incubated on a buffer containing 25 mM Tris/acetate pH 7,5, in order to determine the hydrolytic activities, or in a buffer containing 10 mM of glucose-1-phosphate and rabbit phosphorylase a to reveal the branching activity, or in a buffer containing 10 mM of glucose-1-phosphate to assay phosphorylase activity. After incubation, the gels are stained with iodine solution. Colorless bands characterize hydrolytic activities while phosphorylase and branching activities revealed by glucan synthesis are characterized by a black activity bands.
