# Supplementary material
Source: PubMed Central journal article supplement (PMC4936547)
Supplement: supp_pp.16.00049_PP2016-00049DR1_Supplemental_Materialfig3.pdf [file supp_pp.16.00049_PP2016-00049DR1_Supplemental_Materialfig3.pdf]

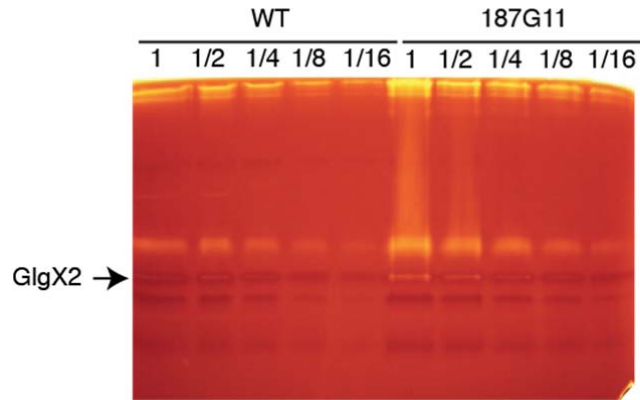

1  
2 **Supplemental Figure 3. Zymogram analysis of the GlgX2 hydrolytic activity in the WT**  
3 **and mutant 187G11 strains.** Total proteins of crude extracts from both strains (52  $\mu$ g of total  
4 proteins) were diluted (1/2, 1/4, 1/8, 1/16) and separated on a native gel containing 0.6%  
5 (weight/vol) of glycogen. After migration, the gel is incubated in a buffer containing 25 mM  
6 Tris/acetate pH 7.5 followed by staining with iodine solution.  
7
