# Supplementary material
Source: PubMed Central journal article supplement (PMC4936547)
Supplement: supp_pp.16.00049_PP2016-00049DR1_Supplemental_Materialfig4.pdf [file supp_pp.16.00049_PP2016-00049DR1_Supplemental_Materialfig4.pdf]

A

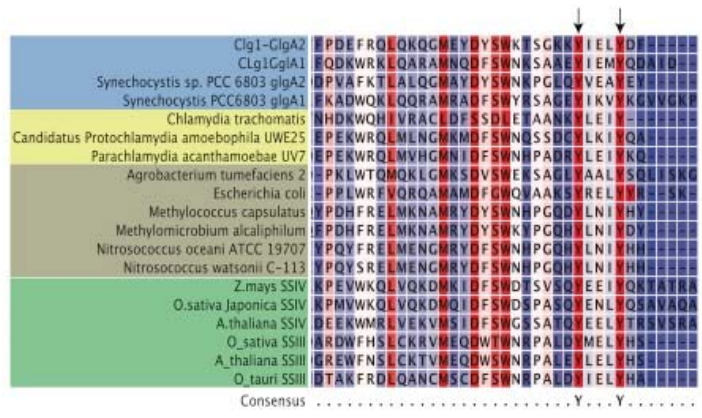

B

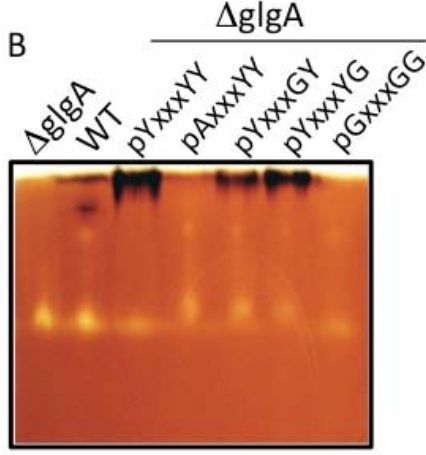

C

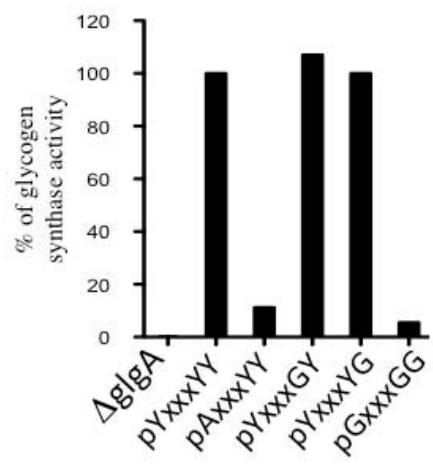

1  
 2 **Supplemental Figure 4.** (A) a YxxxY motif is highly conserved at the C-terminus of  
 3 glycogen/starch synthase of plants and bacteria. Several allelic mutants were produced to  
 4 investigate the role of tyrosine residues in the glycogen synthase activity of *E.coli*. Reverse  
 5 primers were designed to replace either the first tyrosine residue (AxxxYY) or second  
 6 tyrosine residue (YxxGY; YxxxYG) and all tyrosine residues (GxxxGG) by alanine or  
 7 glycine residues. As control, the *GLGA* gene was amplified using reverse primer (YxxxYY).  
 8 PCR products were cloned into the pET15 expression vector and used to transform a *ΔglgA*  
 9 mutant strain of *E.coli*. (JW3392-1 from *E.coli* stock center). (B) Crude extracts of *ΔglgA*,  
 10 WT and recombinant proteins were loaded onto glycogen synthase activity gel (i.e  
 11 zymogram) and (C) glycogen synthase activities were measured by <sup>14</sup>C-ADP-glucose  
 12 incorporation assay as described in the methods section.
