# Supplementary material
Source: PubMed Central journal article supplement (PMC4936547)
Supplement: supp_pp.16.00049_PP2016-00049DR1_Supplemental_Materialfig5.pdf [file supp_pp.16.00049_PP2016-00049DR1_Supplemental_Materialfig5.pdf]

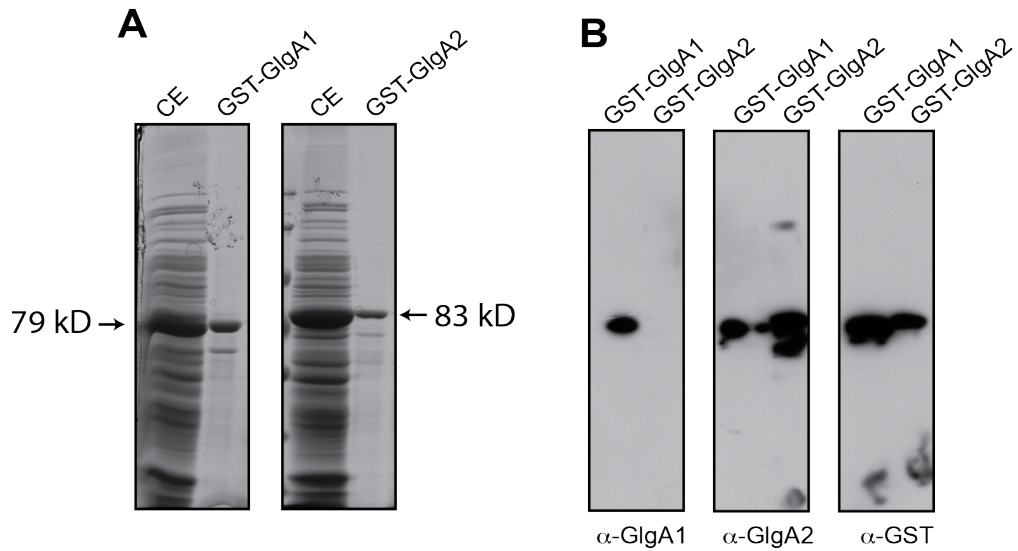

**Supplemental Figure 7.  $^{14}\text{C}$ -Recombinant proteins GlgA1 and GlgA2.** The recombinant proteins GST-GlgA1 and GST-GlgA2 were extracted and observed by sodium dodecyl sulfate polyacrylamide gel electrophoresis (9% SDS-PAGE). (B) Western blot analysis of purified recombinant protein GST-GlgA1 and GST-GlgA2 of *Cyanobacterium* sp CLg1 using the antibodies  $\alpha$ -GlgA1 and  $\alpha$ -GlgA2 of *Synechocystis* PCC6803 and polyclonal antibodies raised against glutathione S-transferase ( $\alpha$ -GST).
