# Supplementary material
Source: PubMed Central journal article supplement (PMC4936547)
Supplement: supp_pp.16.00049_PP2016-00049DR1_Supplemental_Materialfig6.pdf [file supp_pp.16.00049_PP2016-00049DR1_Supplemental_Materialfig6.pdf]

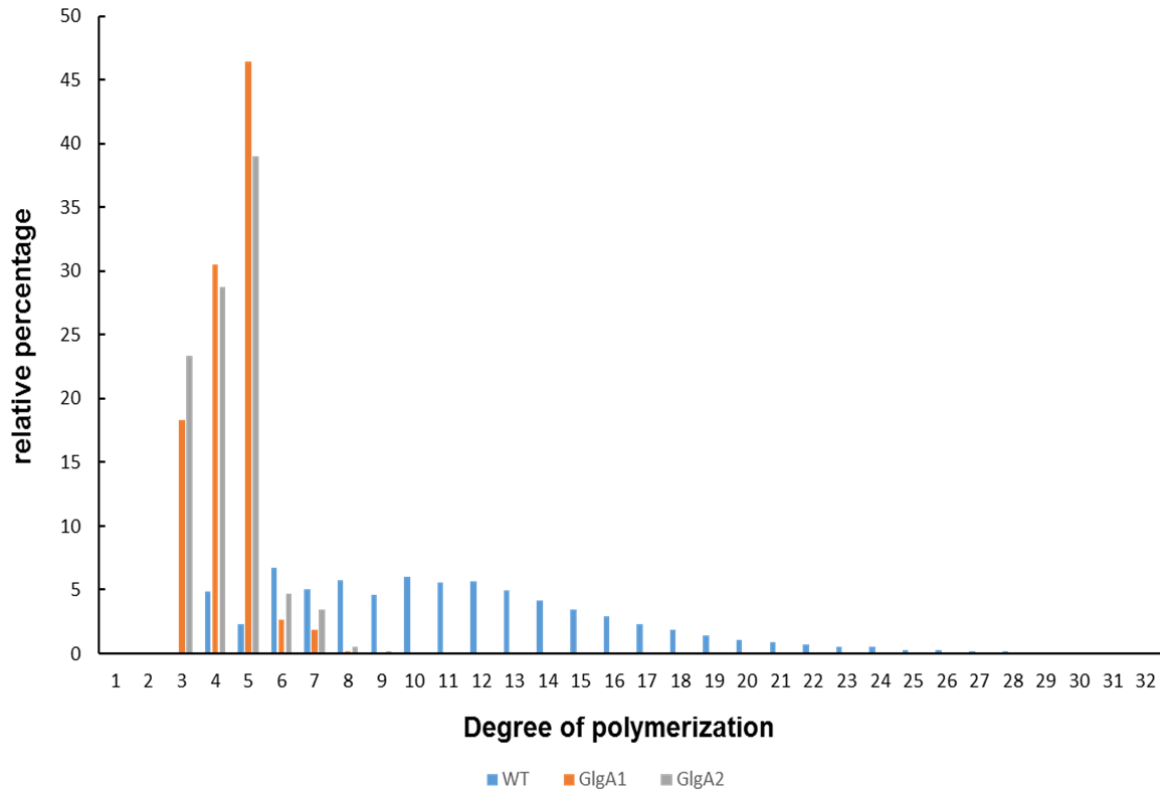

1  
2

3 **Supplemental Figure 6. Structural analysis of the glycogen accumulated by the**  
 4 ***Escherichia.coli* wild type strain and the mutant strain  $\Delta$ glgA deleted in glycogen**  
 5 **synthase complemented with GlgA1 or GlgA2.** The mutant strain  $\Delta$ glgA was  
 6 complemented with pET-glgA1 or pET-glgA2, the cells were cultivated overnight in M9  
 7 medium at 37°C then harvested by centrifugation at 4000g during 10 minutes at 4°C. The  
 8 cells were disrupted through a French Press then centrifuged at 16000 g for 10 min at 4 °C.  
 9 Water-soluble polysaccharides present in the supernatant were purified from the wild type or  
 10 the  $\Delta$ glgA mutant complemented with pET-glgA1 or pET-glgA2. After complete digestion  
 11 with commercial isoamylase, glucan chains were separated according to their degree of  
 12 polymerization (DP) by FACE (Fluorescence anisotropy capillary electrophoresis). The wild  
 13 type strain produces short and long chains, no difference was observed between the mutant  
 14 strains complemented with GlgA1 or GlgA2, both produce a polysaccharide with very short  
 15 chains (DP3 to DP8). This surprising result could be due among others to ineffective  
 16 interaction of the cyanobacterial enzyme with the *E. coli* branching enzyme leading to  
 17 misleading modification of the elongation to branching ratio.
