# Supplementary material
Source: PubMed Central journal article supplement (PMC4936547)
Supplement: supp_pp.16.00049_PP2016-00049DR1_Supplemental_Materialfig7.pdf [file supp_pp.16.00049_PP2016-00049DR1_Supplemental_Materialfig7.pdf]

1

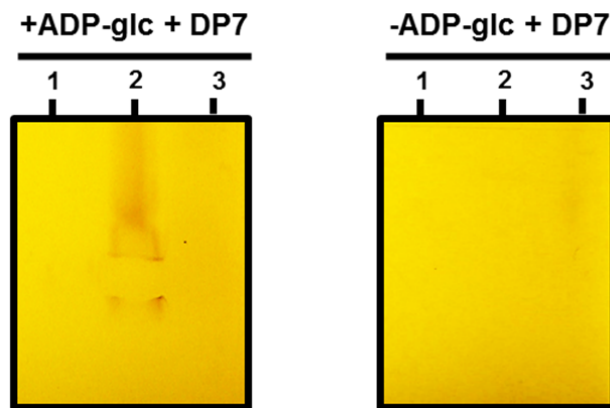

2

3

4 **Supplemental Figure 7. Zymogram analysis of glycogen/starch synthase activities.** Total  
5 proteins of crude extracts of the wild type strain (WT), the 187G11 mutant strain and the  
6 recombinant protein GlgA2, were separated by native PAGE without glycogen. The native  
7 gels were then incubated with or without 3 mM ADP-glucose and 1.2 mM of maltoheptaose  
8 (DP7). 1.2 mM maltoheptaose was also added prior to migration. Glycogen/starch synthase  
9 activities are witnessed after iodine staining as a dark activity bands. The Wild type is able to  
10 initiate glycogen synthesis while the 187G11 mutant and the recombinant protein GlgA2 are  
11 enable do so. **1** : 187G11, **2** : WT, **3** : GlgA2.
