# Supplementary material
Source: PubMed Central journal article supplement (PMC4936547)
Supplement: supp_pp.16.00049_PP2016-00049DR1_Supplemental_Materialfig8.pdf [file supp_pp.16.00049_PP2016-00049DR1_Supplemental_Materialfig8.pdf]

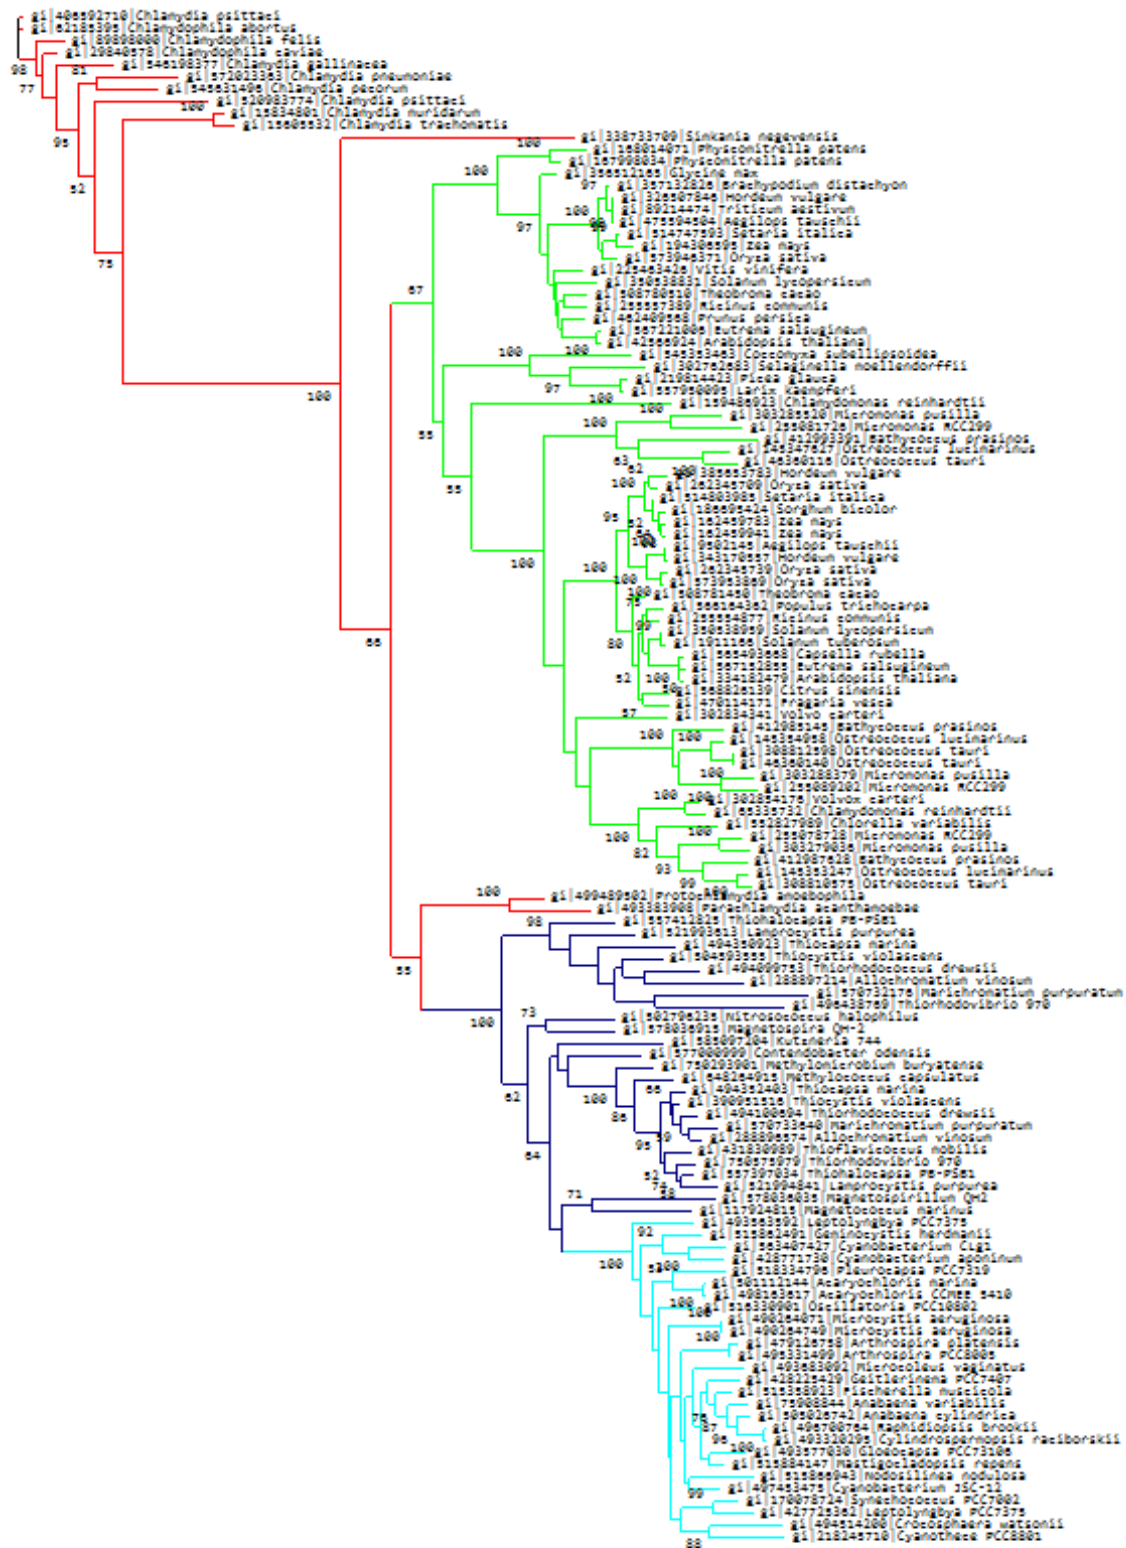

1  
 2 **Supplemental Figure 8.** Detailed representation of phylogenetic tree of glycogen/starch  
 3 synthases belonging to the SIII/SSIV/GlgA2 family displayed in a summarized version in the  
 4 main text (Fig. 10). See legend of Fig 10 for details.
